# Supplementary material
Source: ML conference proceedings conference paper supplement (https://openaccess.thecvf.com/content/ICCV2025/html/Wen_Object-level_Correlation_for_ICCV_2025_paper.html)
Supplement: Supplementary file 1 [file Wen_Object-level_Correlation_for_ICCV_2025_supplemental.pdf]

# Object-level Correlation for Few-Shot Segmentation

## Supplementary Material

Chunlin Wen<sup>1</sup>, Yu Zhang<sup>1</sup>, Jie Fan<sup>2</sup>, Hongyuan Zhu<sup>4</sup>, Xiu-Shen Wei<sup>1</sup>,  
Yijun Wang<sup>1</sup>, Zhiqiang Kou<sup>1</sup>, Shuzhou Sun<sup>3,5</sup>

<sup>1</sup>School of Computer Science and Engineering, Southeast University

<sup>2</sup>Samsung Electronics (China) R&D Centre <sup>3</sup>Shanghai AI Laboratory

<sup>4</sup>Institute for Infocomm Research (I2R), A\*STAR Singapore 138632

<sup>5</sup>Center for Machine Vision and Signal Analysis (CMVS), University of Oulu

### A. Additional results and analyses

Table 6. Ablation studies on the number of the general object prototype.

| $N_g$ | Fold0       | Fold1       | Fold2       | Fold3       | Mean        |
|-------|-------------|-------------|-------------|-------------|-------------|
| 3     | 72.8        | 75.7        | 70.4        | 64.7        | 70.9        |
| 5     | 73.0        | 75.8        | 71.0        | <b>65.0</b> | 71.2        |
| 7     | <b>73.5</b> | <b>75.9</b> | <b>71.1</b> | 64.9        | <b>71.4</b> |
| 9     | 72.6        | 75.7        | 70.4        | 64.4        | 70.8        |
| 11    | 72.7        | 75.8        | 70.4        | 64.2        | 70.8        |

Table 7. Ablation studies on the number of frequency prototype.

| $N_s$ | Fold0       | Fold1       | Fold2       | Fold3       | Mean        |
|-------|-------------|-------------|-------------|-------------|-------------|
| 3     | 72.6        | 75.6        | 70.5        | <b>65.3</b> | 71.0        |
| 4     | 72.6        | 75.8        | 70.2        | 64.7        | 70.8        |
| 5     | <b>73.5</b> | <b>75.9</b> | <b>71.1</b> | 64.9        | <b>71.4</b> |
| 6     | 73.4        | 75.7        | 70.8        | 64.8        | 71.2        |
| 7     | 72.8        | 75.7        | 70.3        | 64.6        | 70.9        |

**Number of the General Object Prototype** The general object prototype  $P_g$  is introduced to learn the general object information in GOMM during the training stage. We conduct ablation experiments to analyze how many general object prototypes are better for object learning. As reported in Table 6, using more prototypes can gradually improve the performance until the number  $N_g$  achieves 7. Then, the performance improves no longer and even drops (71.4% vs. 70.8%). We ascribe this phenomenon to the redundant learned parameters from the more prototypes. Therefore, we use 7 general object prototypes in our model.

**Number of Support Prototype** The support prototype  $P_s$  is the pivotal component in providing the support information for the correlation construction in CCM. To show the impacts of different prototype numbers, we employ 3-7 prototypes for experiments in Table 7. As shown in the table, our model performs best when  $N_s$  is set to 5. Further increasing  $N_s$  does not significantly improve performance. It suggests that we extract more effective prototypes in this setting. So, we set  $N_s$  to 5 for our model.
